# Supplementary material for: Immune adaptor ADAP in T cells regulates HIV-1 transcription and cell-cell viral spread via different co-receptors
Source: PubMed Central journal article supplement (PMC3851709; doi:10.1186/1742-4690-10-101), 2013-09-18

Fig. S3

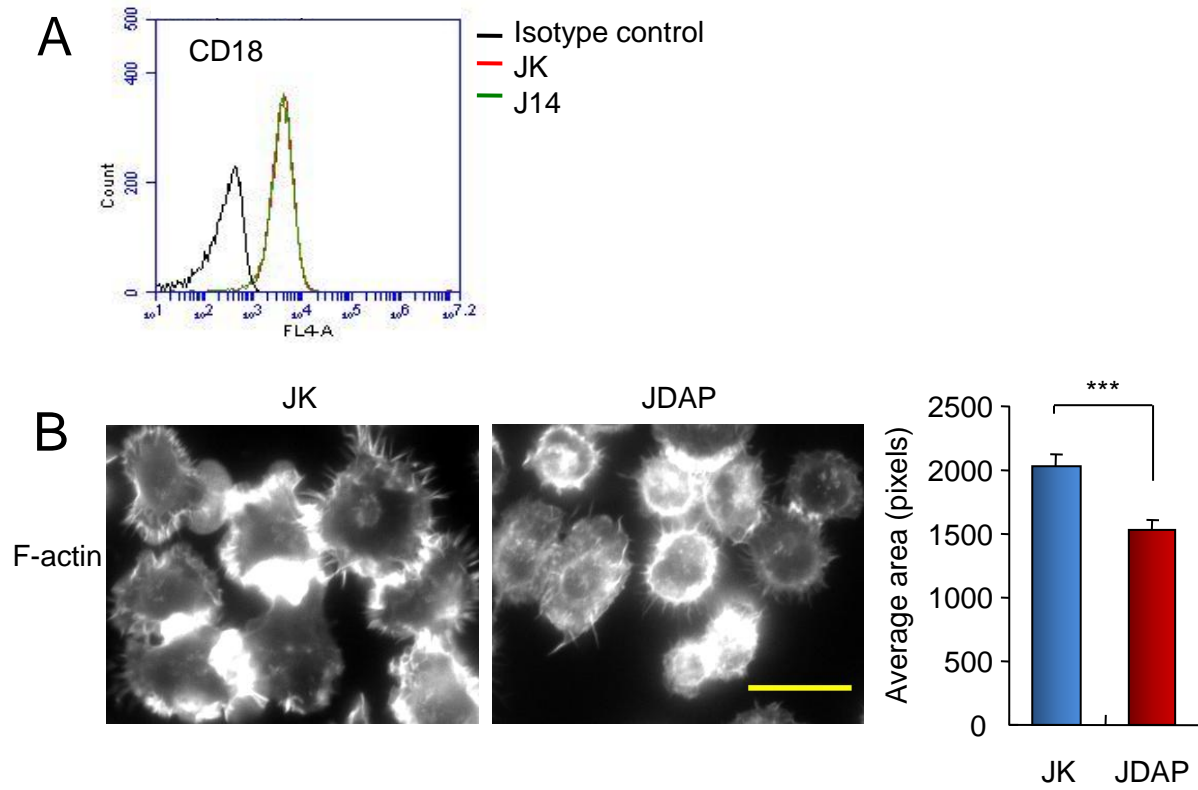

Supplement: 1742-4690-10-101-S3.pdf [file 1742-4690-10-101-S3.pdf]
